# Supplementary material for: Curcuma longa L. Rhizome Extract as a Poly(vinyl chloride)/Graphene Nanocomposite Green Modifier
Source: MDPI journal article supplement (doi:10.3390/molecules27228081), 2022-11-21
Supplement: s1 [file s1]

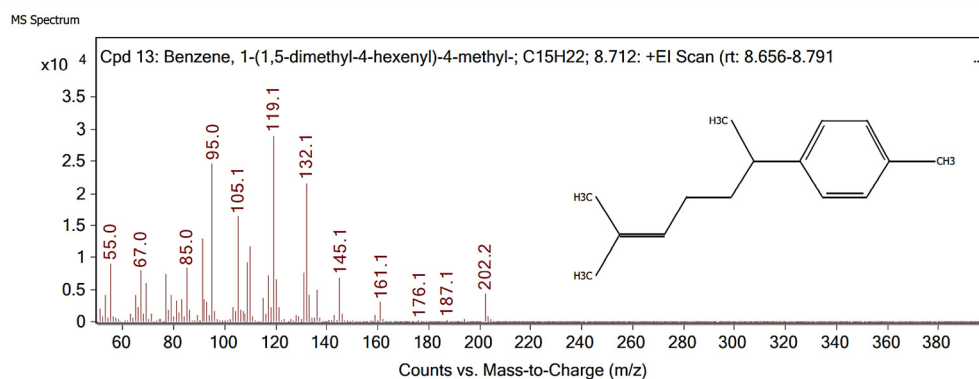

**Figure S1.** Mass spectrum of Ar-Curcumene

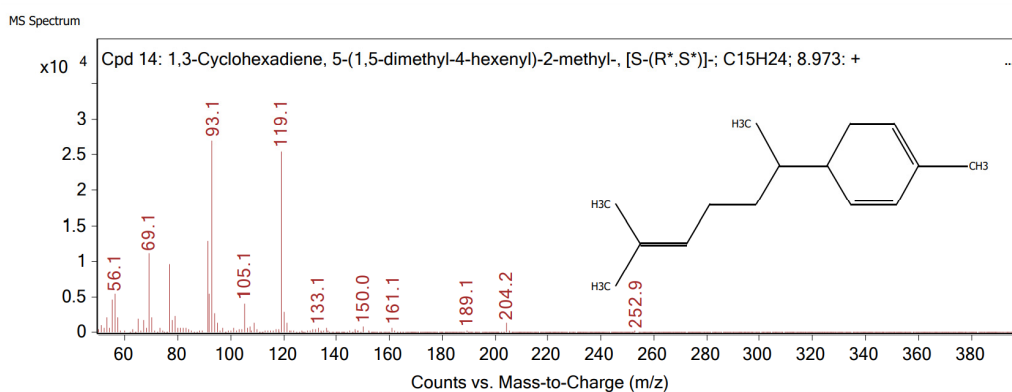

**Figure S2.** Mass spectrum of (-)-Zingiberene

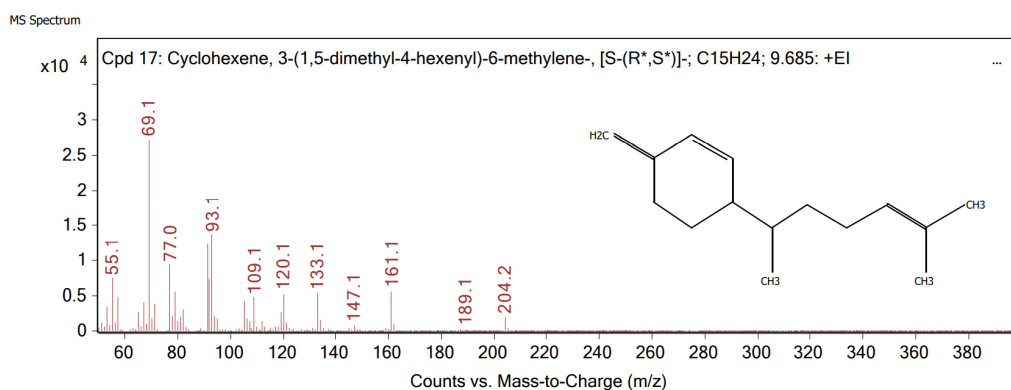

**Figure S3.** Mass spectrum of β-Sesquiphelandrene

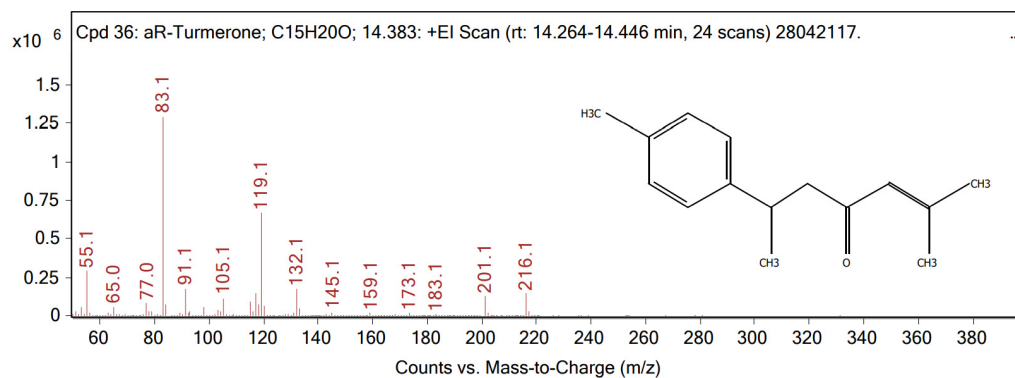

**Figure S4.** Mass spectrum of Ar-turmerone

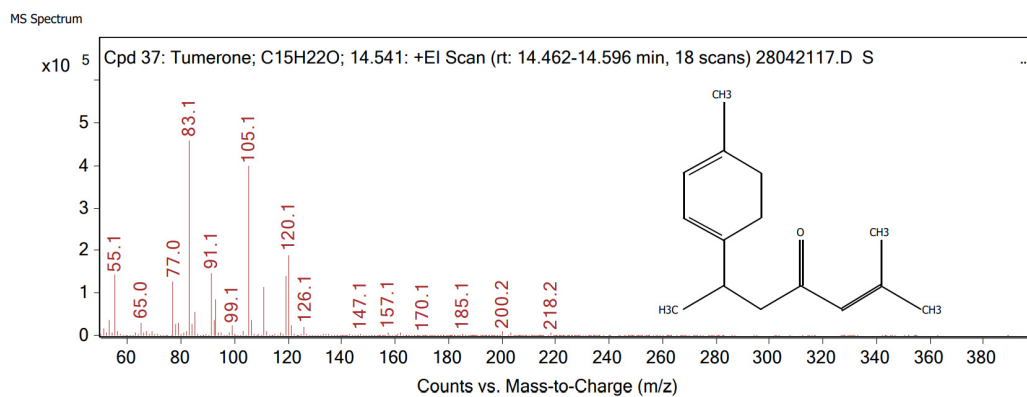

**Figure S5.** Mass spectrum of α-turmerone

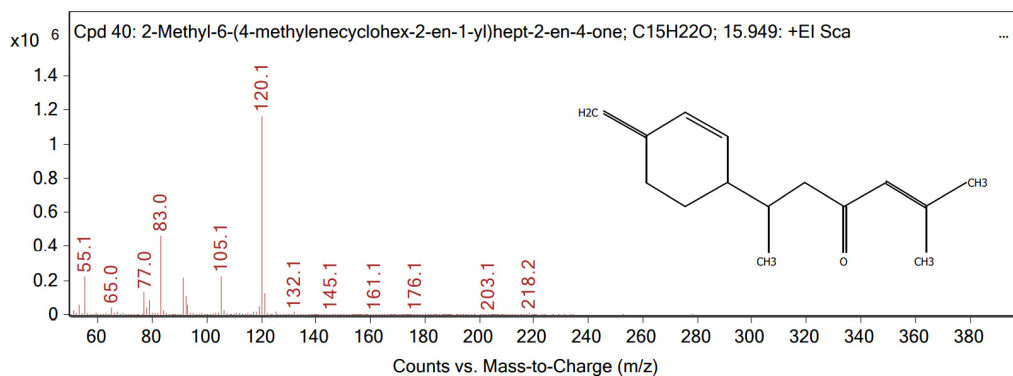

**Figure S6.** Mass spectrum of β-turmerone

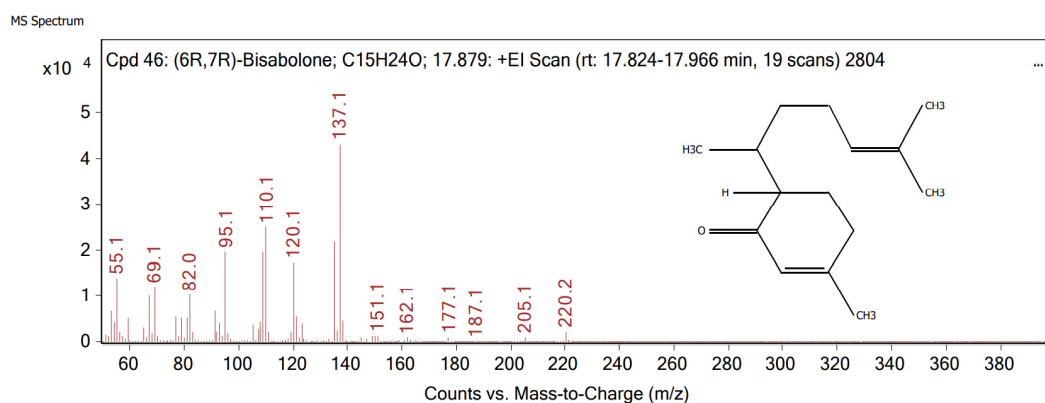

**Figure S7.** Mass spectrum of (6R,7R)-Bisabolene

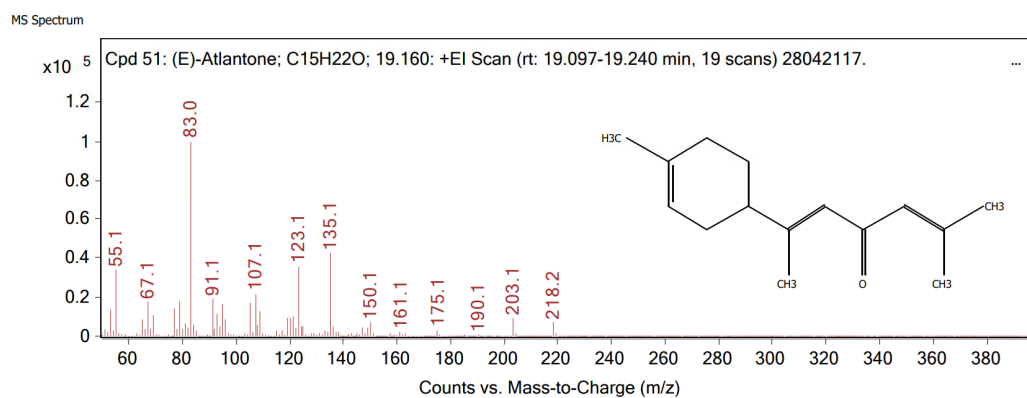

**Figure S8.** Mass spectrum of (E)-atlantone

**Table S1.** Mechanical and electrical properties of PVC/GN nanocomposites

| Material       | Tensile<br>strenght,<br>MPa | Volume resistivity,<br>$\Omega\text{m}$       | Surface resistivity,<br>$\Omega$               |
|----------------|-----------------------------|-----------------------------------------------|------------------------------------------------|
| PVC            | 16.8 (0.7)                  | $7.7 \times 10^{14}$ ( $3.8 \times 10^{11}$ ) | $7.5 \times 10^{15}$ ( $6.7 \times 10^{13}$ )  |
| PVC+CE         | 19.0 (0.8)                  | $3.1 \times 10^{14}$ ( $2.2 \times 10^{11}$ ) | $4.5 \times 10^{15}$ ( $3.9 \times 10^{13}$ )  |
| PVC/0.01%GN    | 18.5 (0.8)                  | $1.9 \times 10^{13}$ ( $1.5 \times 10^{11}$ ) | $5.8 \times 10^{15}$ ( $6.9 \times 10^{13}$ )  |
| PVC/0.01%GN+CE | 25.1 (1.0)                  | $1.2 \times 10^{14}$ ( $8.2 \times 10^{11}$ ) | $2.5 \times 10^{15}$ ( $1.9 \times 10^{13}$ )  |
| PVC/0.1%GN     | 21.8 (1.0)                  | $1.6 \times 10^{13}$ ( $9.8 \times 10^{10}$ ) | $2.4 \times 10^{15}$ ( $1.9 \times 10^{13}$ )  |
| PVC/0.1%GN+CE  | 23.6 (1.0)                  | $1.7 \times 10^{13}$ ( $1.7 \times 10^{11}$ ) | $2.3 \times 10^{13}$ ( $2.7 \times 10^{11}$ )  |
| PVC/0.5%GN     | 21.5 (1.4)                  | $8.4 \times 10^9$ ( $8.4 \times 10^7$ )       | $2.0 \times 10^{13}$ ( $1.8 \times 10^{11}$ )  |
| PVC/0.5%GN+CE  | 22.4 (1.2)                  | $1.2 \times 10^{13}$ ( $1.2 \times 10^{11}$ ) | $2.2 \times 10^{13}$ ( $4.2 \times 10^{11}$ )  |
| PVC/1%GN       | 21.2 (0.9)                  | $3.9 \times 10^5$ ( $3.5 \times 10^4$ )       | $1.5 \times 10^7$ ( $2.1 \times 10^5$ )        |
| PVC/1%GN+CE    | 22.7 (0.3)                  | $1.2 \times 10^{13}$ ( $9.9 \times 10^{10}$ ) | $2.11 \times 10^{13}$ ( $4.9 \times 10^{11}$ ) |
